# Supplementary material
Source: Springer Nature journal article supplement (https://www.springermedizin.de/resource/supplementary/12931_2011_1155_MOESM4_ESM.pdf/9425448)

**(A)****WT (sham)**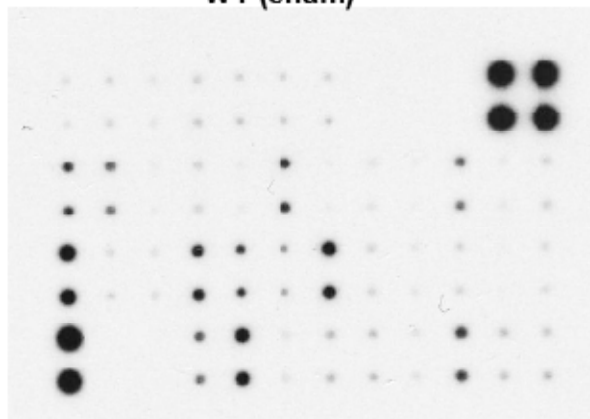**CD69<sup>-/-</sup> (sham)**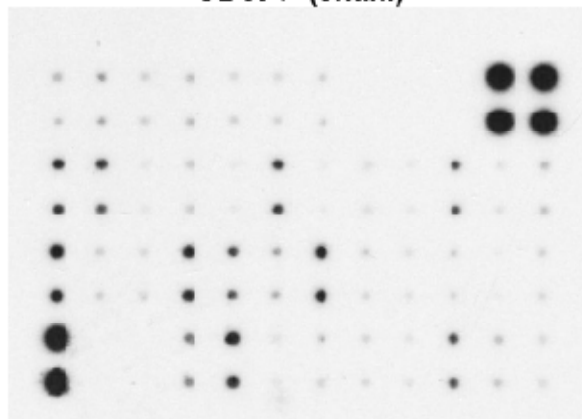**WT(BLM)**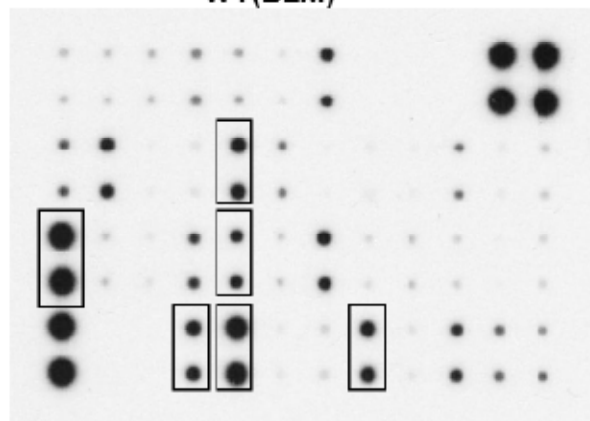**CD69<sup>-/-</sup> (BLM)**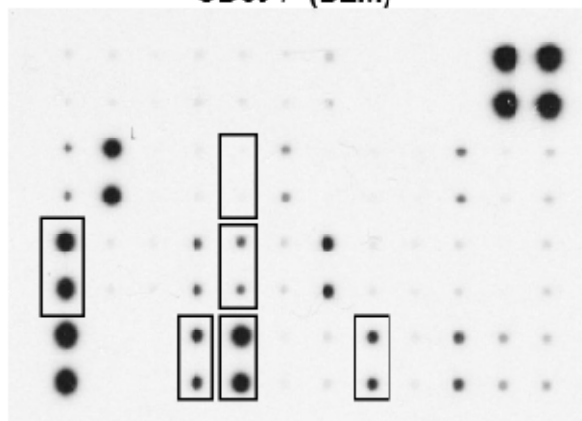**(B)**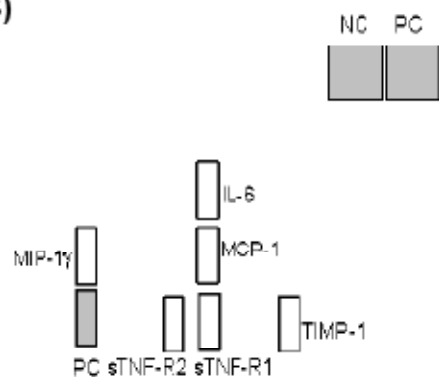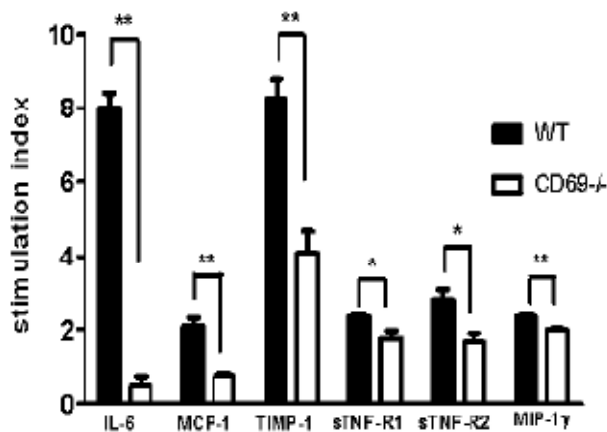

Supplement: MOESM4 [file 9425448]
